# Supplementary material
Source: Springer Nature journal article supplement (https://www.springermedizin.de/resource/supplementary/13033_2014_199_MOESM5_ESM.pdf/9652044)

# Comparison between reality and professionals' perception

Number of Units

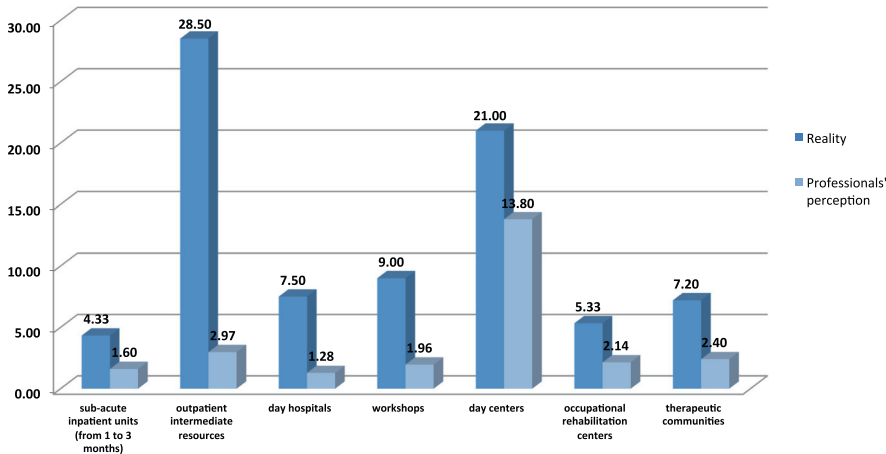

Supplement: MOESM5 [file 9652044]
